# Supplementary material
Source: PubMed Central journal article supplement (PMC3381076)
Supplement: NIHMS380628-supplement-1.pdf [file NIHMS380628-supplement-1.pdf]

# **Determination of $^{15}\text{N}$ chemical shift anisotropy from a membrane bound protein by NMR spectroscopy**

## **Supporting Information**

Manoj Kumar Pandey<sup>1</sup>, Subramanian Vivekanandan<sup>1</sup>, Shivani Ahuja<sup>1</sup>, Kumar Pichumani<sup>2</sup>, Sang-Choul Im<sup>3</sup>, Lucy Waskell<sup>3</sup> and Ayyalusamy Ramamoorthy<sup>\*1</sup>

<sup>1</sup>Biophysics and Department of Chemistry, University of Michigan, Ann Arbor, Michigan 48109-1055

<sup>2</sup>Advanced Imaging Research Center, University of Texas southwestern Medical Center, 2201 Inwood Road, Dallas, Texas 75390-8568

<sup>3</sup> Department of Anesthesiology, University of Michigan and VA Medical Center, Ann Arbor, Michigan 48105

\*To whom correspondence should be addressed (ramamoor@umich.edu)

Table S1. Measured backbone amide-<sup>15</sup>N transverse cross-correlation rates ( $\eta_{xy}$ ) for various residues of cytb<sub>5</sub>.

| Residue | $\eta_{xy}$ (s <sup>-1</sup> ) | Residue | $\eta_{xy}$ (s <sup>-1</sup> ) |
|---------|--------------------------------|---------|--------------------------------|
| K7      | 3.23±0.23                      | D58     | 16.39±0.93                     |
| D8      | 3.73±0.37                      | A59     | 14.75±1.17                     |
| V9      | 8.47±0.46                      | T60     | 16.16±0.91                     |
| K10     | 14.51±1.36                     | E61     | 18.72±2.20                     |
| Y11     | 14.32±0.89                     | N62     | 14.75±0.83                     |
| Y12     | 14.94±2.30                     | F63     | 16.41±0.48                     |
| T13     | 12.89±1.07                     | E64     | 15.73±0.89                     |
| L14     | 15.99±1.36                     | D65     | 14.38±0.63                     |
| E15     | 18.40±3.07                     | V66     | 16.35±1.11                     |
| E16     | 15.68±0.96                     | G67     | 12.43±0.50                     |
| I17     | 19.65±2.27                     | H68     | 9.62±2.29                      |
| K18     | 19.26±0.79                     | S69     | 10.35±0.26                     |
| K19     | 16.14±0.82                     | T70     | 15.70±1.44                     |
| H20     | 15.99±1.35                     | D71     | 16.82±0.84                     |
| N21     | 14.63±1.05                     | A72     | 15.78±1.23                     |
| H22     | 16.63±1.11                     | R73     | 15.24±0.71                     |
| K24     | 18.36±0.24                     | E74     | 16.64±0.87                     |
| T26     | 16.12±1.04                     | S76     | 13.38±0.51                     |
| W27     | 16.09±0.78                     | K77     | 16.46±0.22                     |
| L28     | 13.84±1.20                     | T78     | 13.67±0.34                     |
| I29     | 13.48±0.65                     | F79     | 13.86±0.71                     |
| H31     | 16.74±2.18                     | I80     | 14.51±0.27                     |
| V34     | 15.89±2.77                     | I81     | 17.28±1.51                     |
| Y35     | 17.69±0.89                     | G82     | 13.92±0.76                     |
| D36     | 15.51±0.74                     | E83     | 14.56±1.40                     |
| T38     | 18.62±1.87                     | L84     | 16.49±0.81                     |
| K39     | 14.56±1.34                     | H85     | 16.07±1.12                     |
| F40     | 10.06±0.73                     | D87     | 14.68±0.91                     |
| L41     | 17.21±0.23                     | D88     | 17.89±1.87                     |
| E42     | 13.60±0.26                     | R89     | 16.19±0.64                     |
| E43     | 15.11±0.51                     | L92     | 11.9±1.08                      |
| H44     | 11.37±0.62                     | S93     | 5.07±1.03                      |
| E48     | 17.21±1.79                     | K94     | 6.57±0.47                      |
| E49     | 13.60±0.25                     | E97     | 6.79±0.74                      |
| V50     | 16.05±1.12                     | T98     | 6.76±0.98                      |
| L51     | 16.40±1.30                     | L99     | 6.52±0.87                      |
| R52     | 17.01±0.53                     | T101    | 5.79±0.62                      |
| E53     | 16.52±0.97                     | T102    | 7.74±0.52                      |
| Q54     | 16.52±0.46                     | D104    | 7.88±1.43                      |
| A55     | 15.58±0.55                     | A132    | 11.77±1.39                     |
| G56     | 13.29±1.10                     | D133    | 7.66±0.24                      |
| G57     | 14.20±0.88                     | D134    | 2.64±0.07                      |

Table S2. Calculated backbone amide-<sup>15</sup>N CSA values (in ppm) for various residues of cytb<sub>5</sub>. Calculations were performed by taking effective internuclear distance between amide nitrogen and proton ( $r_{\text{NH}}$ ) as 1.023 Å while angle ( $\beta$ ) between NH dipolar vector with CSA tensor described in principal axis system was varied from 12° to 20°.

| Residue | $\Delta\sigma_{12^\circ}$ | $\Delta\sigma_{13^\circ}$ | $\Delta\sigma_{14^\circ}$ | $\Delta\sigma_{15^\circ}$ | $\Delta\sigma_{16^\circ}$ | $\Delta\sigma_{17^\circ}$ | $\Delta\sigma_{18^\circ}$ | $\Delta\sigma_{19^\circ}$ | $\Delta\sigma_{20^\circ}$ |
|---------|---------------------------|---------------------------|---------------------------|---------------------------|---------------------------|---------------------------|---------------------------|---------------------------|---------------------------|
| K7      | -63.1                     | -63.9                     | -64.8                     | -65.8                     | -66.9                     | -68.0                     | -69.3                     | -70.7                     | -72.2                     |
| D8      | -67.0                     | -67.8                     | -68.8                     | -69.8                     | -71.0                     | -72.2                     | -73.6                     | -75.1                     | -76.7                     |
| V9      | -129.3                    | -131.3                    | -133.5                    | -135.9                    | -138.7                    | -141.7                    | -145.0                    | -148.7                    | -152.9                    |
| K10     | -180.4                    | -183.9                    | -187.9                    | -192.4                    | -197.6                    | -203.4                    | -210.2                    | -218.0                    | -227.2                    |
| Y11     | -143.4                    | -145.8                    | -148.4                    | -151.3                    | -154.5                    | -158.1                    | -162.1                    | -166.6                    | -171.7                    |
| Y12     | -159.9                    | -162.7                    | -165.8                    | -169.3                    | -173.3                    | -177.7                    | -182.8                    | -188.4                    | -194.9                    |
| T13     | -107.7                    | -109.2                    | -110.9                    | -112.8                    | -114.9                    | -117.1                    | -119.7                    | -122.4                    | -125.5                    |
| L14     | -141.1                    | -143.4                    | -145.9                    | -148.7                    | -151.8                    | -155.3                    | -159.2                    | -163.6                    | -168.5                    |
| E15     | -164.8                    | -167.8                    | -171.1                    | -174.8                    | -179.0                    | -183.8                    | -189.2                    | -195.3                    | -202.3                    |
| E16     | -137.0                    | -139.2                    | -141.6                    | -144.3                    | -147.3                    | -150.6                    | -154.3                    | -158.4                    | -163.0                    |
| I17     | -186.8                    | -190.6                    | -194.9                    | -199.7                    | -205.3                    | -211.7                    | -219.2                    | -227.9                    | -238.4                    |
| K18     | -159.1                    | -161.8                    | -164.9                    | -168.4                    | -172.3                    | -176.7                    | -181.3                    | -187.3                    | -193.7                    |
| K19     | -159.9                    | -162.8                    | -165.9                    | -169.4                    | -173.4                    | -177.8                    | -182.9                    | -188.5                    | -195.0                    |
| H20     | -140.9                    | -143.1                    | -145.6                    | -148.4                    | -151.6                    | -155.1                    | -159.0                    | -163.3                    | -168.2                    |
| N21     | -132.3                    | -134.3                    | -136.6                    | -139.1                    | -142.0                    | -145.1                    | -148.6                    | -152.4                    | -156.7                    |
| H22     | -132.3                    | -134.3                    | -136.6                    | -139.1                    | -141.9                    | -145.1                    | -148.5                    | -152.4                    | -156.7                    |
| K24     | -160.5                    | -163.3                    | -166.5                    | -170.0                    | -174.0                    | -178.5                    | -183.5                    | -189.3                    | -195.8                    |
| T26     | -131.4                    | -133.4                    | -135.7                    | -138.2                    | -141.0                    | -144.1                    | -147.5                    | -151.4                    | -155.6                    |
| W27     | -176.7                    | -180.0                    | -183.9                    | -188.2                    | -193.1                    | -198.6                    | -205.0                    | -212.4                    | -220.9                    |
| L28     | -143.8                    | -146.1                    | -148.7                    | -151.6                    | -154.9                    | -158.5                    | -162.5                    | -167.1                    | -172.1                    |
| I29     | -123.2                    | -125.0                    | -127.1                    | -129.4                    | -131.9                    | -134.7                    | -137.8                    | -141.2                    | -145.0                    |
| H31     | -160.3                    | -163.2                    | -166.3                    | -169.9                    | -173.8                    | -178.3                    | -183.4                    | -189.1                    | -195.6                    |
| V34     | -135.1                    | -137.2                    | -139.6                    | -142.2                    | -145.1                    | -148.4                    | -152.0                    | -156.0                    | -160.5                    |
| Y35     | -168.9                    | -171.9                    | -175.4                    | -179.4                    | -183.8                    | -188.8                    | -194.5                    | -201.0                    | -208.5                    |
| D36     | -162.2                    | -165.1                    | -168.3                    | -171.9                    | -176.0                    | -180.6                    | -185.7                    | -191.6                    | -198.3                    |
| T38     | -149.0                    | -151.4                    | -154.2                    | -157.3                    | -160.8                    | -164.6                    | -169.0                    | -173.8                    | -179.3                    |
| K39     | -117.8                    | -119.5                    | -121.4                    | -123.5                    | -125.9                    | -128.5                    | -131.4                    | -134.5                    | -138.0                    |
| F40     | -92.9                     | -94.1                     | -95.5                     | 97.1                      | -98.8                     | -100.6                    | -102.7                    | -104.9                    | -107.4                    |
| L41     | -181.8                    | -185.4                    | -189.4                    | -194.0                    | -199.2                    | -205.2                    | -212.1                    | -220.1                    | -229.6                    |
| E42     | -170.6                    | -173.7                    | -177.2                    | -181.2                    | -185.8                    | -190.9                    | -196.7                    | -203.4                    | -211.1                    |
| E43     | -197.6                    | -201.8                    | -206.7                    | -212.3                    | -218.8                    | -226.3                    | -235.2                    | -246.0                    | -259.3                    |
| H44     | -128.5                    | -130.4                    | -132.6                    | -135.1                    | -137.7                    | -140.7                    | -144.0                    | -147.7                    | -151.8                    |
| E48     | -155.0                    | -157.6                    | -160.6                    | -163.9                    | -167.6                    | -171.8                    | -176.5                    | -181.8                    | -187.8                    |

|     |        |        |        |        |        |        |        |        |        |
|-----|--------|--------|--------|--------|--------|--------|--------|--------|--------|
| E49 | -123.6 | -125.5 | -127.5 | -129.8 | -132.3 | -135.1 | -138.2 | -141.7 | -145.5 |
| V50 | -171.2 | -174.4 | -178.0 | -182.0 | -186.6 | -191.7 | -197.6 | -204.3 | -212.1 |
| L51 | -176.9 | -180.3 | -184.1 | -188.5 | -193.4 | -199.0 | -205.3 | -212.7 | -221.4 |
| R52 | -201.7 | -206.2 | -211.3 | -217.3 | -224.1 | -232.2 | -241.8 | -253.5 | -268.4 |
| E53 | -184.1 | -187.7 | -191.9 | -196.6 | -202.0 | -208.2 | -215.3 | -223.6 | -233.5 |
| Q54 | -202.2 | -206.7 | -211.9 | -217.9 | -224.8 | -232.9 | -242.6 | -254.5 | -269.6 |
| A55 | -175.3 | -178.6 | -182.3 | -186.6 | -191.4 | -196.8 | -203.1 | -210.3 | -218.6 |
| G56 | -125.1 | -127.0 | -129.1 | -131.4 | -134.0 | -136.8 | -140.0 | -143.5 | -147.4 |
| G57 | -115.6 | -117.3 | -119.2 | -121.3 | -123.6 | -126.1 | -128.9 | -132.0 | -135.4 |
| D58 | -164.9 | -167.9 | -171.2 | -174.9 | -179.1 | -183.9 | -189.3 | -195.4 | -202.4 |
| A59 | -121.1 | -122.9 | -124.9 | -127.1 | -129.6 | -132.3 | -135.3 | -138.6 | -142.3 |
| T60 | -158.2 | -161.0 | -164.1 | -167.5 | -171.4 | -175.8 | -180.7 | -186.2 | -192.5 |
| E61 | -200.1 | -204.5 | -209.6 | -215.4 | -222.1 | -229.9 | -239.3 | -250.6 | -264.9 |
| N62 | -159.1 | -161.8 | -164.9 | -168.4 | -172.3 | -176.7 | -181.7 | -187.3 | -193.7 |
| F63 | -166.1 | -169.1 | -172.5 | -176.3 | -180.6 | -185.4 | -190.9 | -197.1 | -204.3 |
| E64 | -169.6 | -172.7 | -176.2 | -180.2 | -184.7 | -189.7 | -195.5 | -202.1 | -209.6 |
| D65 | -171.9 | -175.1 | -178.7 | -182.8 | -187.4 | -192.6 | -198.5 | -205.3 | -213.2 |
| V66 | 215.5  | -220.7 | -226.8 | -234.0 | -242.4 | -252.7 | -265.4 | -282.1 | -306.7 |
| G67 | -141.1 | -143.4 | -145.9 | -148.7 | -151.8 | -155.3 | -159.2 | -163.6 | -168.5 |
| H68 | -204.1 | -208.7 | -213.9 | -220.1 | -227.2 | -235.5 | -245.6 | -258.0 | -273.9 |
| S69 | -110.4 | -112.0 | -113.7 | -115.7 | -117.8 | -120.2 | -122.8 | -125.6 | -128.8 |
| T70 | -126.0 | -127.9 | -130.0 | -132.3 | -135.0 | -137.8 | -141.0 | -145.0 | -148.5 |
| D71 | -167.6 | -169.6 | -172.9 | -176.8 | -181.1 | -185.9 | -191.4 | -197.7 | -204.9 |
| A72 | -156.6 | -159.3 | -162.3 | -165.7 | -169.5 | -173.7 | -178.5 | -184.0 | -190.1 |
| R73 | -161.5 | -164.3 | -167.5 | -171.1 | -175.2 | -179.7 | -184.8 | -190.6 | -197.3 |
| E74 | -197.2 | -201.4 | -206.3 | -211.8 | -218.3 | -225.8 | -234.6 | -245.3 | -258.4 |
| S76 | -150.2 | -152.7 | -155.5 | -158.6 | -162.1 | -166.0 | -170.4 | -175.4 | -181.0 |
| K77 | -161.1 | -163.9 | -167.1 | -170.7 | -174.7 | -179.2 | -184.3 | -190.1 | -196.7 |
| T78 | -116.3 | -117.9 | -119.8 | -121.9 | -124.2 | -126.8 | -129.6 | -132.7 | -136.2 |
| F79 | -134.1 | -136.2 | -138.5 | -141.1 | -144.0 | -147.2 | -150.7 | -154.7 | -159.1 |
| I80 | -132.5 | -134.5 | -136.8 | -139.3 | -142.2 | -145.3 | -148.8 | -152.7 | -157.0 |
| I81 | -166.7 | -169.7 | -173.1 | -176.9 | -181.2 | -186.1 | -191.6 | -197.9 | -205.2 |
| G82 | -125.4 | -127.3 | -129.4 | -131.8 | -134.4 | -137.2 | -140.4 | -143.9 | -147.9 |
| E83 | -139.0 | -141.3 | -143.7 | -146.5 | -149.5 | -152.9 | -156.7 | -161.0 | -165.7 |
| L84 | -154.5 | -157.1 | -160.1 | -163.4 | -167.1 | -171.2 | -175.9 | -181.1 | -187.1 |
| H85 | -157.3 | -160.0 | -163.1 | -166.5 | -170.3 | -174.6 | -179.5 | -185.0 | -191.2 |
| D87 | -93.6  | -94.9  | -96.3  | -97.9  | -99.6  | -101.4 | -103.5 | -105.8 | -108.3 |
| D88 | -133.4 | -135.5 | -137.8 | -140.3 | -143.2 | -146.4 | -149.9 | -153.8 | -158.2 |
| R89 | -139.2 | -141.4 | -143.9 | -146.6 | -149.7 | -153.1 | -156.9 | -161.2 | -165.9 |
| L92 | -112.6 | -114.3 | -116.1 | -118.1 | -120.3 | -122.7 | -125.4 | -128.4 | -131.6 |
| S93 | -55.2  | -55.8  | -56.6  | -57.4  | -58.4  | -59.4  | -60.5  | -61.7  | -63.0  |
| K94 | -87.0  | -88.1  | -89.4  | -90.8  | -92.4  | -94.1  | -96.0  | -98.0  | -100.3 |

|      |        |        |        |        |        |        |        |        |        |
|------|--------|--------|--------|--------|--------|--------|--------|--------|--------|
| E97  | -91.6  | -92.8  | -94.2  | -95.7  | -97.4  | -99.2  | -101.2 | -103.4 | -105.8 |
| T98  | -86.8  | -88.0  | -89.3  | -90.7  | -92.2  | -93.9  | -95.8  | -97.9  | -100.1 |
| L99  | -83.2  | -84.3  | -85.6  | -86.9  | -88.4  | -90.0  | -91.8  | -93.7  | -95.9  |
| T101 | -52.1  | -52.8  | -53.5  | -54.3  | -55.1  | -56.1  | -57.1  | -58.2  | -59.5  |
| T102 | -97.5  | -98.8  | -100.3 | -101.9 | -103.7 | -105.7 | -107.9 | -110.3 | -112.9 |
| D104 | -90.0  | -91.2  | -92.5  | -94.0  | -95.7  | -97.4  | -99.4  | -101.6 | -103.9 |
| A132 | -120.1 | -121.9 | -123.9 | -126.1 | -128.5 | -131.2 | -134.2 | -137.4 | -141.1 |
| D133 | -100.9 | -102.4 | -103.9 | -105.6 | -107.5 | -109.6 | -111.9 | -114.4 | -117.2 |
| D134 | -101.2 | -102.6 | -104.1 | -105.8 | -107.7 | -109.8 | -112.1 | -114.6 | -117.4 |

Table S3. Ratio of transverse cross-correlation rate ( $\eta_{xy}$ ) and transverse relaxation rate ( $R_2$ ) for various residues of cytb<sub>5</sub>.  $R_2$  was determined using CPMG based HSQC pulse sequence.<sup>1</sup>

| Residue | $\eta_{xy}/R_2$ | Residue | $\eta_{xy}/R_2$ |
|---------|-----------------|---------|-----------------|
| K7      | 0.31            | D58     | 0.69            |
| D8      | 0.32            | A59     | 0.55            |
| V9      | 0.58            | T60     | 0.67            |
| K10     | 0.73            | E61     | 0.78            |
| Y11     | 0.62            | N62     | 0.67            |
| Y12     | 0.68            | F63     | 0.69            |
| T13     | 0.50            | E64     | 0.70            |
| L14     | 0.62            | D65     | 0.67            |
| E15     | 0.69            | V66     | 0.81            |
| E16     | 0.60            | G67     | 0.62            |
| I17     | 0.75            | H68     | 0.79            |
| K18     | 0.62            | S69     | 0.51            |
| K19     | 0.68            | T70     | 0.57            |
| H20     | 0.62            | D71     | 0.69            |
| N21     | 0.59            | A72     | 0.67            |
| H22     | 0.59            | R73     | 0.68            |
| K24     | 0.68            | E74     | 0.77            |
| T26     | 0.58            | S76     | 0.65            |
| W27     | 0.72            | K77     | 0.68            |
| L28     | 0.63            | T78     | 0.53            |
| I29     | 0.56            | F79     | 0.59            |
| H31     | 0.68            | I80     | 0.59            |
| V34     | 0.60            | I81     | 0.69            |
| Y35     | 0.70            | G82     | 0.56            |
| D36     | 0.68            | E83     | 0.61            |
| T38     | 0.64            | L84     | 0.66            |
| K39     | 0.54            | H85     | 0.67            |
| F40     | 0.44            | D87     | 0.44            |
| L41     | 0.73            | D88     | 0.59            |
| E42     | 0.71            | R89     | 0.61            |
| E43     | 0.77            | L92     | 0.52            |
| H44     | 0.57            | S93     | 0.27            |
| E48     | 0.66            | K94     | 0.41            |
| E49     | 0.56            | E97     | 0.43            |
| V50     | 0.71            | T98     | 0.41            |
| L51     | 0.72            | L99     | 0.40            |
| R52     | 0.78            | T101    | 0.26            |
| E53     | 0.74            | T102    | 0.46            |
| Q54     | 0.78            | D104    | 0.42            |
| A55     | 0.72            | A132    | 0.54            |
| G56     | 0.56            | D133    | 0.47            |
| G57     | 0.53            | D134    | 0.47            |

Table S4. Backbone amide-<sup>15</sup>N CSA values determined from peptides and proteins using solution NMR approach.

| System                                 | CSA range                                                  | Average CSA | Reference |
|----------------------------------------|------------------------------------------------------------|-------------|-----------|
| HIV-1 protease                         |                                                            | 170 ppm     | (2)       |
| Ubiquitin                              | -125 to -216 ppm                                           | 157±19 ppm  | (3)       |
| GATA1-DNA complex                      |                                                            | 168±20 ppm  | (4)       |
| Ribonuclease-H                         | -129 to -213 ppm                                           | -172±13 ppm | (5)       |
| GB3                                    | -111 to -240 ppm<br>Helix: -178 ppm<br>Sheet: -181 ppm     | -178 ppm    | (6)       |
| Ubiquitin                              | -138 to -207 ppm                                           | -169 ppm    | (7)       |
| GB3 in liquid crystalline medium       | -148 to -190 ppm<br>Helix: -173±7 ppm<br>Sheet: -162±6 ppm | -166±9 ppm  | (8)       |
| Lysozyme in bicelles                   |                                                            | -174 ppm    | (9)       |
| Ubiquitin in liquid crystalline medium |                                                            | 162±4 ppm   | (10)      |
| C12A-p8 <sup>MTCPI</sup>               | -160 to -245 ppm                                           | -180 ppm    | (11)      |
| Ubiquitin in liquid crystalline medium | Helix: -166±9 ppm<br>Sheet: -161±6 ppm                     | -163±8 ppm  | (12)      |

Table S5. Backbone amide-<sup>15</sup>N CSA values determined from peptides and proteins using solid-state NMR approach.

| System                                                                                              | CSA<br>[ $\delta_{11} - 0.5 * (\delta_{22} + \delta_{33})$ ]                     | CSA span<br>( $\delta_{11} - \delta_{33}$ ) | Reference |
|-----------------------------------------------------------------------------------------------------|----------------------------------------------------------------------------------|---------------------------------------------|-----------|
| Ac[1- <sup>13</sup> C]Ala<br>[ <sup>15</sup> N]AlaNH <sub>2</sub>                                   | 165 ppm                                                                          | 185 ppm                                     | (13)      |
| Gly[ <sup>15</sup> N]GlyH <sub>2</sub> O                                                            | 160 ppm                                                                          | 175 ppm                                     | (14)      |
| GB1                                                                                                 | -109 ppm; [ $\delta_{11} - \delta_{iso}$ ]<br>Helix: -115 ppm<br>Sheet: -106 ppm |                                             | (15)      |
| NAG                                                                                                 | 161 ppm                                                                          | 183 ppm                                     | (16)      |
| Collagen powder                                                                                     | 169 ppm                                                                          | 181 ppm                                     | (15)      |
| [1- <sup>13</sup> C]<br>glycyl <sub>2</sub> [ <sup>15</sup> N]alan<br>yl <sub>3</sub> -gramicidin A | 156 ppm                                                                          | 169 ppm                                     | (17)      |
| N-AcVal Leu:<br>Val                                                                                 | 156 ppm                                                                          | 170 ppm                                     | (18)      |
| N-AcVal Leu:<br>Leu                                                                                 | 156 ppm                                                                          | 174 ppm                                     | (18)      |
| (Ala) <sub>n</sub>                                                                                  | Helix: 158 ppm                                                                   | 175 ppm                                     | (19)      |
| (Ala) <sub>5</sub>                                                                                  | Sheet: 148 ppm                                                                   | 157 ppm                                     | (19)      |
| (Ala, Val) <sub>n</sub>                                                                             | Helix: 154 ppm                                                                   | 159 ppm                                     | (20)      |
| (Gly) <sub>n</sub>                                                                                  | Sheet: 152 ppm                                                                   | 160 ppm                                     | (21)      |
| (Gly, Ala) <sub>n</sub>                                                                             | Helix: 162 ppm                                                                   | 168 ppm                                     | (21)      |
| Asp(OBzl) <sub>n</sub>                                                                              | Helix: 159 ppm<br>Sheet: 154 ppm                                                 | Helix: 166 ppm<br>Sheet: 162 ppm            | (22)      |
| Tripeptide AGG<br>and GGV                                                                           |                                                                                  | 157- 176 ppm                                | (23)      |
| NAV                                                                                                 | 153-166 ppm [at<br>different spinning<br>rate]                                   | 169-179 ppm                                 | (24)      |
| NAVL Valine                                                                                         | 145 to 158 ppm<br>[at different spinning<br>rates]                               | 168-177 ppm                                 | (24)      |
| NAVL Leucine                                                                                        | 150 to 159<br>[at different spinning<br>rates]                                   | 169-174 ppm                                 | (24)      |



Table S6. Backbone amide-<sup>15</sup>N CSA values determined from peptides and proteins using computational approach.

| System                         | CSA<br>[ $\delta_{11} - 0.5 * (\delta_{22} + \delta_{33})$ ]                                             | Reference |
|--------------------------------|----------------------------------------------------------------------------------------------------------|-----------|
| Cytochrome c <sub>551</sub>    | 142 to 159 ppm                                                                                           | (24)      |
| GB3                            | Helix: 159 ppm<br>Sheet: 158 ppm                                                                         | (25)      |
| NMA, N-formyl-alanyl-X and GB3 | -155 to -168 ppm<br>Helix: -164 ppm<br>Sheet: -160 ppm<br>Mean: -160 ppm                                 | (26)      |
| Dipeptides                     | 138 to 186 ppm<br>Helix: 144 (Ala-X)<br>and 155 ppm (X-Ala)<br>Sheet: 169 (Ala-X)<br>and 178 ppm (X-Ala) | (27)      |
| GB1                            | $\delta = [\delta_{11} - \delta_{iso}]$<br>Helix: 108 ppm<br>Sheet: 102 ppm                              | (28)      |
| GB3                            | $\delta = [\delta_{11} - \delta_{iso}]$<br>Helix: 109 ppm<br>Sheet: 104 ppm                              | (28)      |

Figure S1. Residues of cytb<sub>5</sub> within 12.5Å distance from paramagnetic center Fe(III) of the heme unit.

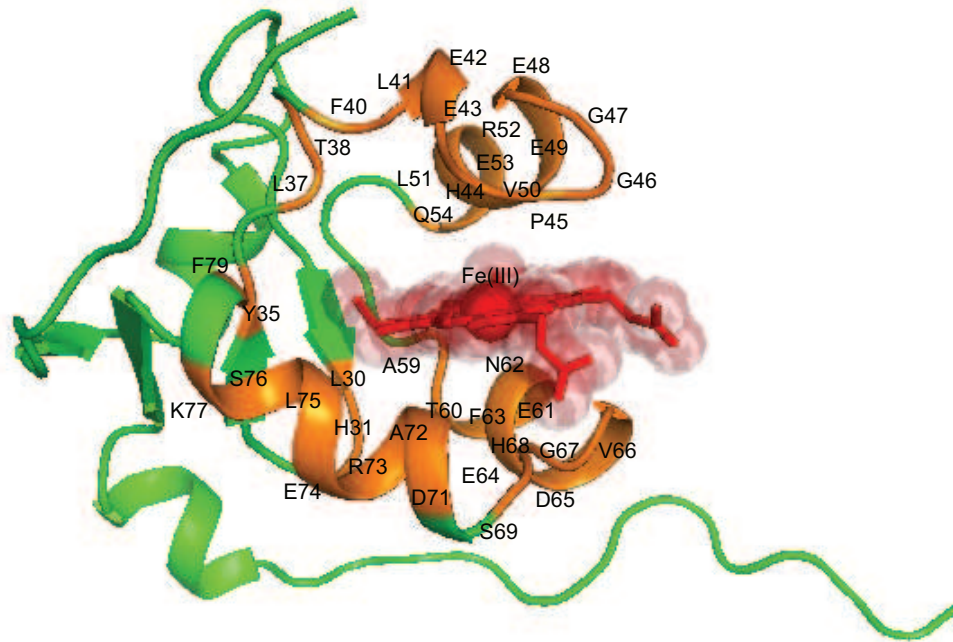

Figure S2. Calculated difference in  $^{15}\text{N}$  CSA obtained at internuclear distances ( $r_{\text{N-H}}$ ) 1.023 and 1.04 Å.

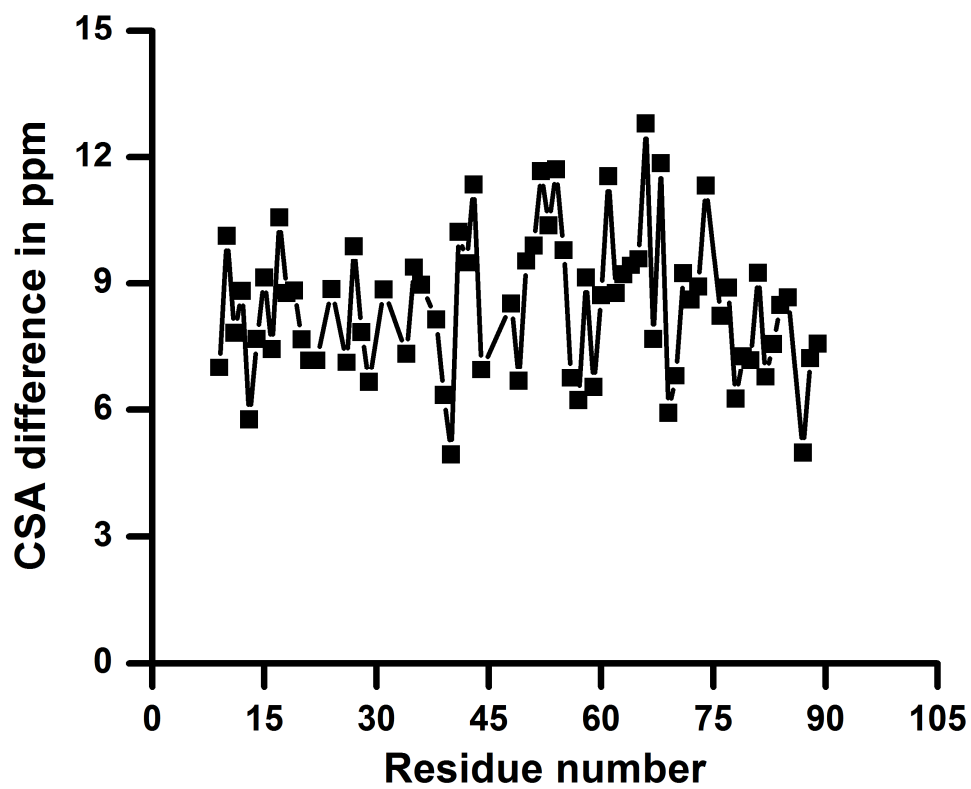

## References

- (1) Kay, L. E.; Nicholson L. K.; Delaglio, F.; Bax, A.; Torchia, D. A. *J. Magn. Reson.* **1992**, *97*, 359.
- (2) Tjandra, N.; Wingfield, P.; Stahl, S.; Bax, A. *J. Biomol. NMR* **1996**, *8*, 273.
- (3) Fushman, D.; Tjandra, N.; Cowburn, D. *J. Am. Chem. Soc.* **1998**, *120*, 10947.
- (4) Ottiger, M.; Tjandra, N.; Bax, A. *J. Am. Chem. Soc.* **1997**, *119*, 9825.
- (5) Kroenke, C. D.; Rance, M.; Palmer III, A. G. *J. Am. Chem. Soc.* **1999**, *121*, 10119.
- (6) Hall, J. B.; Fushman, D. *J. Am. Chem. Soc.* **2006**, *128*, 7855.
- (7) Damberg, P.; Jarvet, J.; Gräslund, A. *J. Am. Chem. Soc.* **2005**, *127*, 1995.
- (8) Yao, L.; Grishaev, A.; Cornilescu, G.; Bax, A. *J. Am. Chem. Soc.* **2010**, *132*, 4295.
- (9) Boyd, J.; Redfield, C. *J. Am. Chem. Soc.* **1999**, *121*, 7441.
- (10) Kurita, J.; Shimahara, H.; Utsunomiya-Tate, N.; Tate, S. *J. Magn. Reson.* **2003**, *163*, 163.
- (11) Canet, D.; Barthe, P.; Mutzenhardt, P.; Roumestand, C. *J. Am. Chem. Soc.* **2001**, *123*, 4567.
- (12) Cornilescu, G.; Bax, A. *J. Am. Chem. Soc.* **2000**, *122*, 10143.
- (13) Oas, T. G.; Hartzell, C. J.; Dahlquist, F. W.; Drobny, G. P. *J. Am. Chem. Soc.* **1987**, *109*, 5962.
- (14) Fukutani, A.; Naito, A.; Tuzi, S.; Saitô, H. *J. Mol. Struct.* **2002**, *602*, 491.
- (15) Wylie, B. J.; Sperling, L. J.; Frericks, H. L.; Shah, G. J.; Franks, W. T.; Reinstra, C. M. *J. Am. Chem. Soc.* **2007**, *129*, 5318.
- (16) Lee, D. K.; Wittebort, R. J.; Ramamoorthy, A. *J. Am. Chem. Soc.* **1998**, *120*, 8868.
- (17) Teng, Q.; Cross, T. A. *J. Magn. Reson.* **1989**, *85*, 439.
- (18) Lee, D. K.; Wei, Y.; Ramamoorthy, A. *J. Phys. Chem. B* **2001**, *105*, 4752.
- (19) Shoji, A.; Ozaki, T.; Fujito, T.; Deguchi, K.; Ando, S.; Ando, I. *Macromolecules* **1989**, *22*, 2860.
- (20) Shoji, A.; Ozaki, T.; Fujito, T.; Deguchi, K.; Ando, S.; Ando, I. *J. Am. Chem. Soc.* **1990**, *112*, 4693.
- (21) Shoji, A.; Ozaki, T.; Fujito, T.; Deguchi, K.; Ando, I.; Magoshi, J. *J. Mol. Struct.* **1998**, *441*, 251.
- (22) Ashikawa, M.; Shoji, A.; Ozaki, T.; Ando, I. *Macromolecules* **1999**, *32*, 2288.
- (23) Chekmenev, E. Y.; Zhang, Q.; Waddell, K. W.; Mashuta, M. S.; Wittebort, R. J. *J. Am. Chem. Soc.* **2003**, *126*, 379.
- (24) Wei, Y.; Lee, D.-K.; McDermott, A. E.; Ramamoorthy, A. *J. Magn. Reson.* **2002**, *158*, 23.
- (25) Le, H.; Oldfield, E. *J. Phys. Chem.* **1996**, *100*, 16423.
- (26) Cai, L.; Kosov, D. S.; Fushman, D. *J. Biomol. NMR* **2011**, *50*, 19.
- (27) Cai, L. F., D.; Kosov, D. S. *J. Biomol. NMR* **2008**, *41*, 77.
- (28) Poon, A.; Birn, J.; Ramamoorthy, A. *J. Phys. Chem. B* **2004**, *108*, 16577.
- (29) Tang, S.; Case, D. A. *J. Biomol. NMR* **2011**, *51*, 303.
